# Supplementary material
Source: MDPI journal article supplement (https://www.mdpi.com/2076-3417/10/19/6649)
Supplement: s1 [file s1]

Supplementary Materials: Application of *k*0-INAA Method in Preliminary Characterization of KRISS Urban Airborne Particulate Matter Certified Reference Material

Hana Cho 1,*, Kishore B. Dasari 2, Myung Chul Lim 1, Gwang Min Sun 2, Radojko Jaćimović 3,* and Yong-Hyeon Yim 1,*

1 Inorganic Metrology Group, Division of Chemical and Biological Metrology, Korea Research Institute of Standards and Science, Daejeon 34113, Korea; mclim@kriss.re.kr (M.C.L.)

2 Neutron and Radioisotope Application Research Division, Korea Atomic Energy Research Institute, Daejeon 34057, Korea; dasari@kaeri.re.kr (K.B.D.); gmsun@kaeri.re.kr (G.M.S.)

3 Department of Environmental Sciences, Jožef Stefan Institute, 1000 Ljubljana, Slovenia

***** Correspondence: hanacho@kriss.re.kr (H.C.); radojko.jacimovic@ijs.si (R.J.); yhyim@kriss.re.kr (Y.-H.Y.)





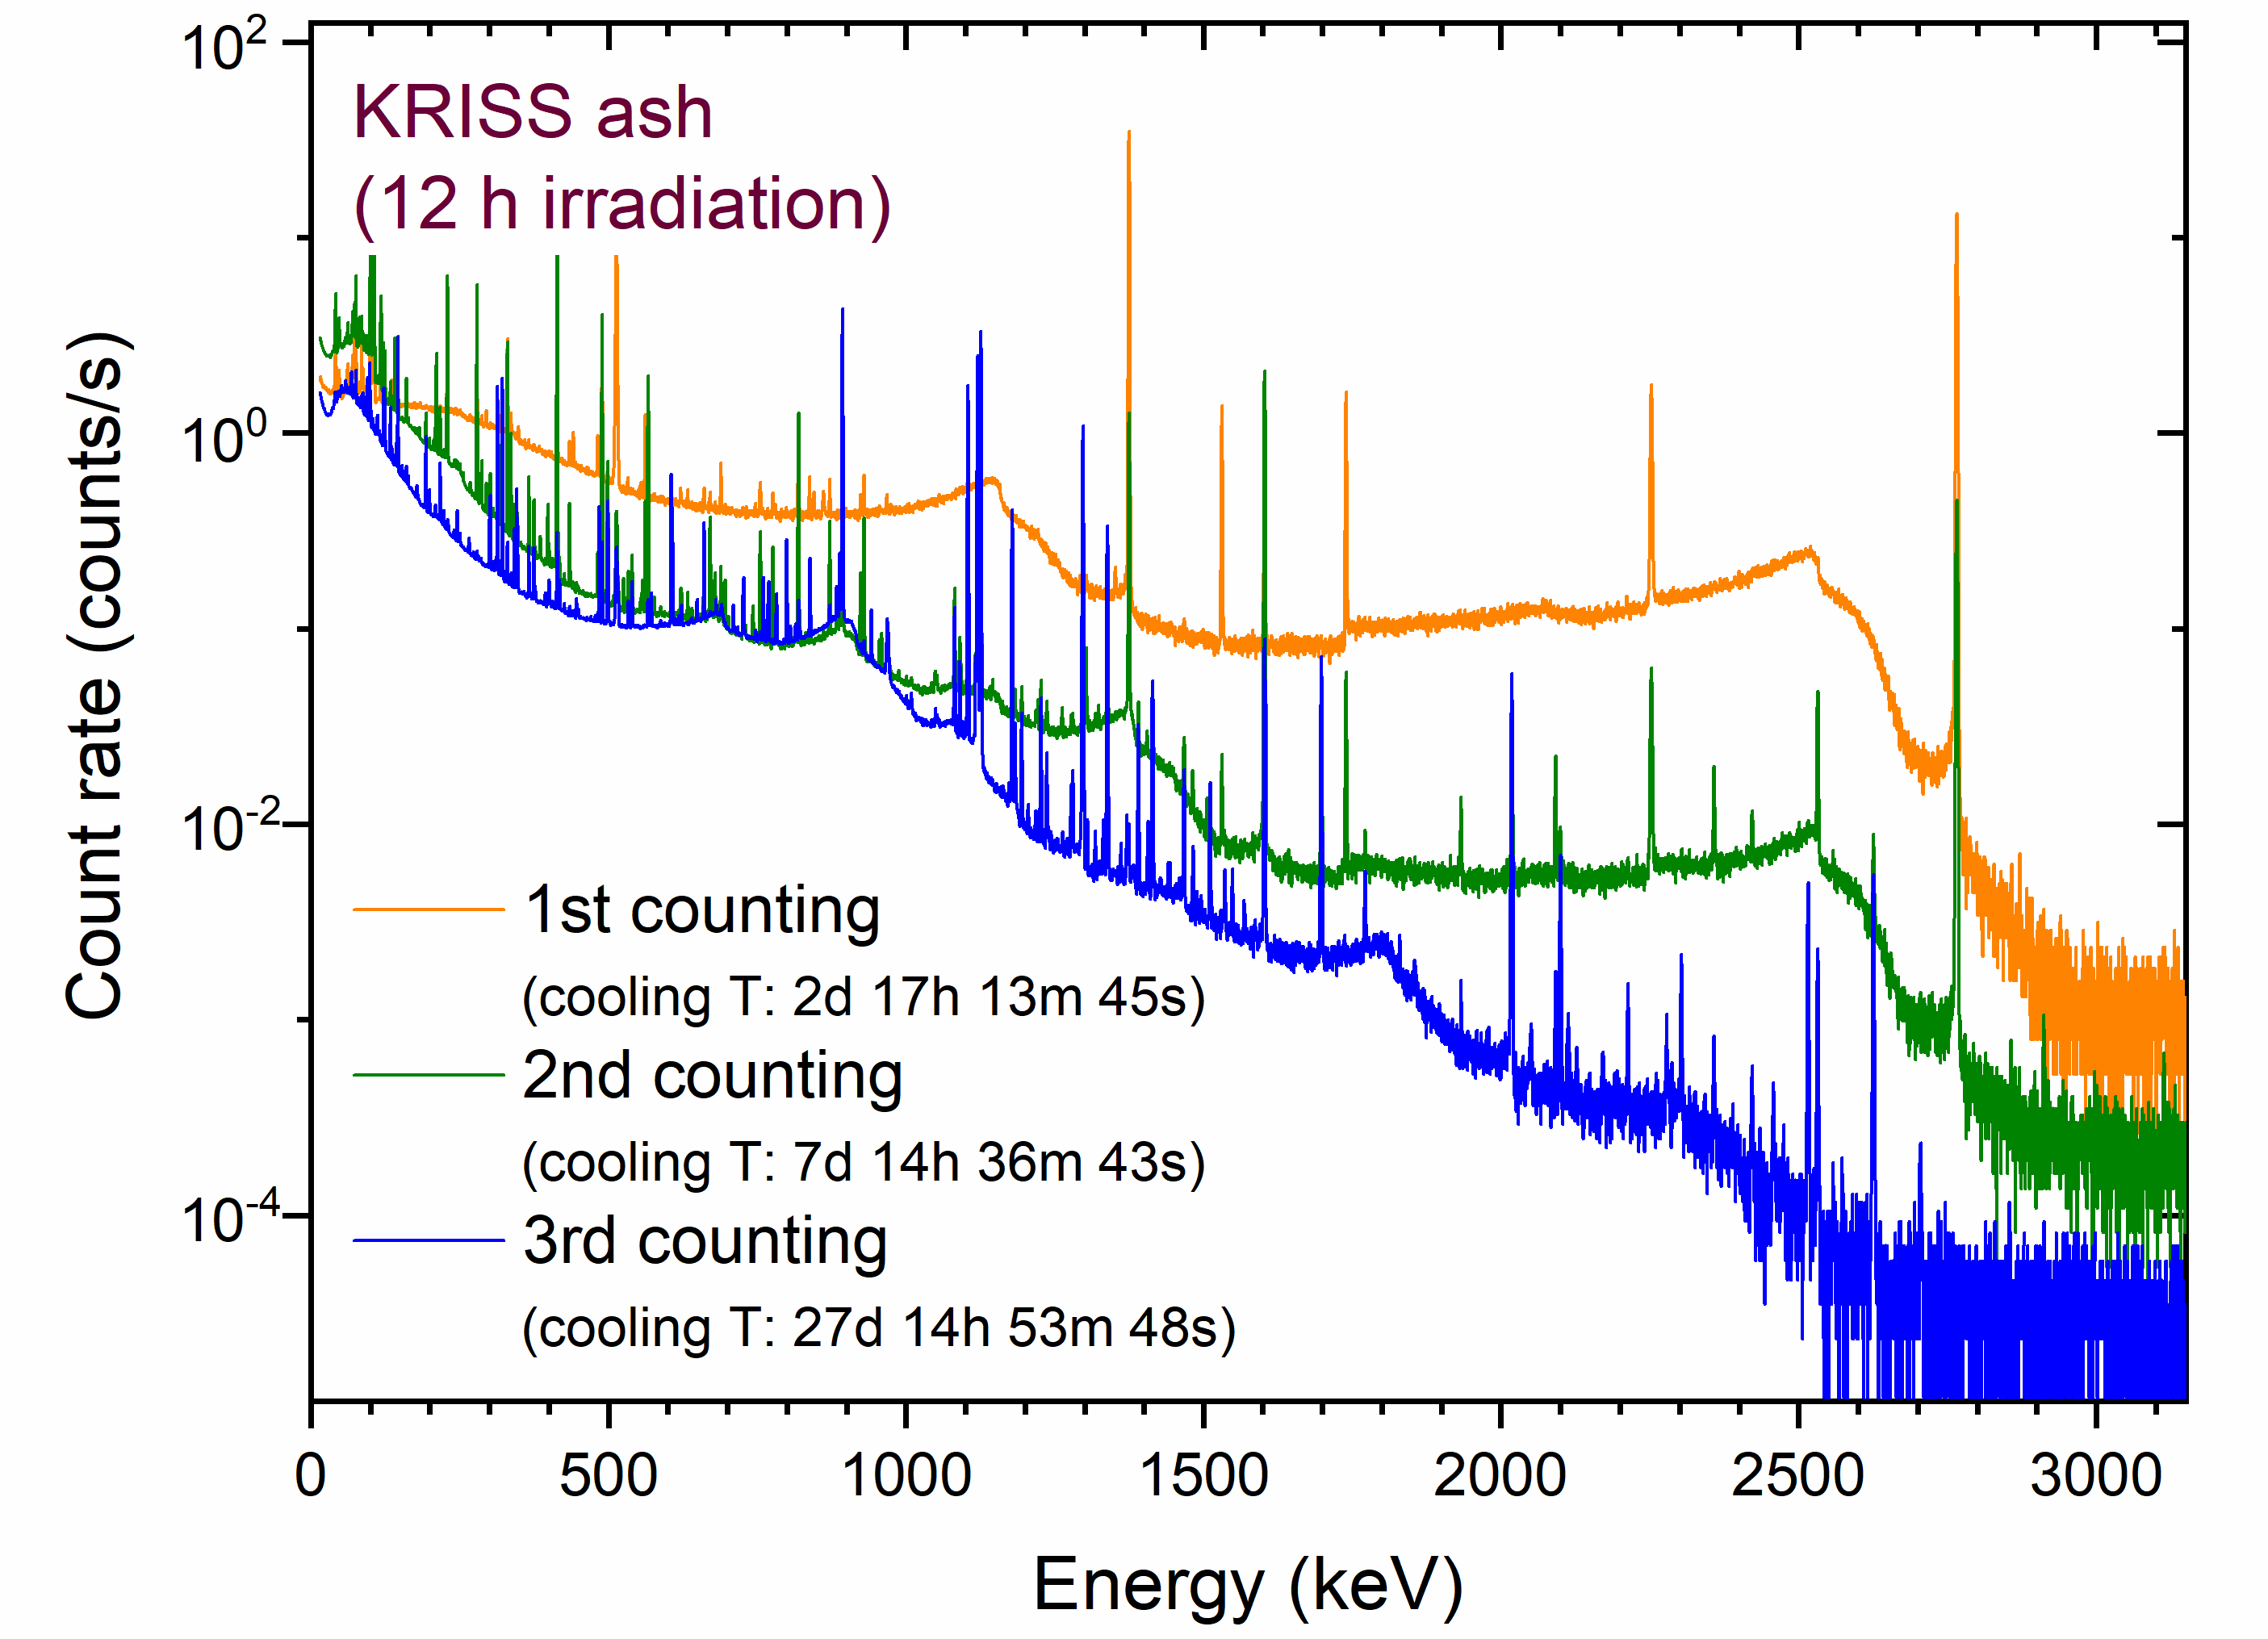


**Figure S1.** Gamma-ray spectra of KRISS ash CRM candidate after 2 min and 12 h irradiation**.**





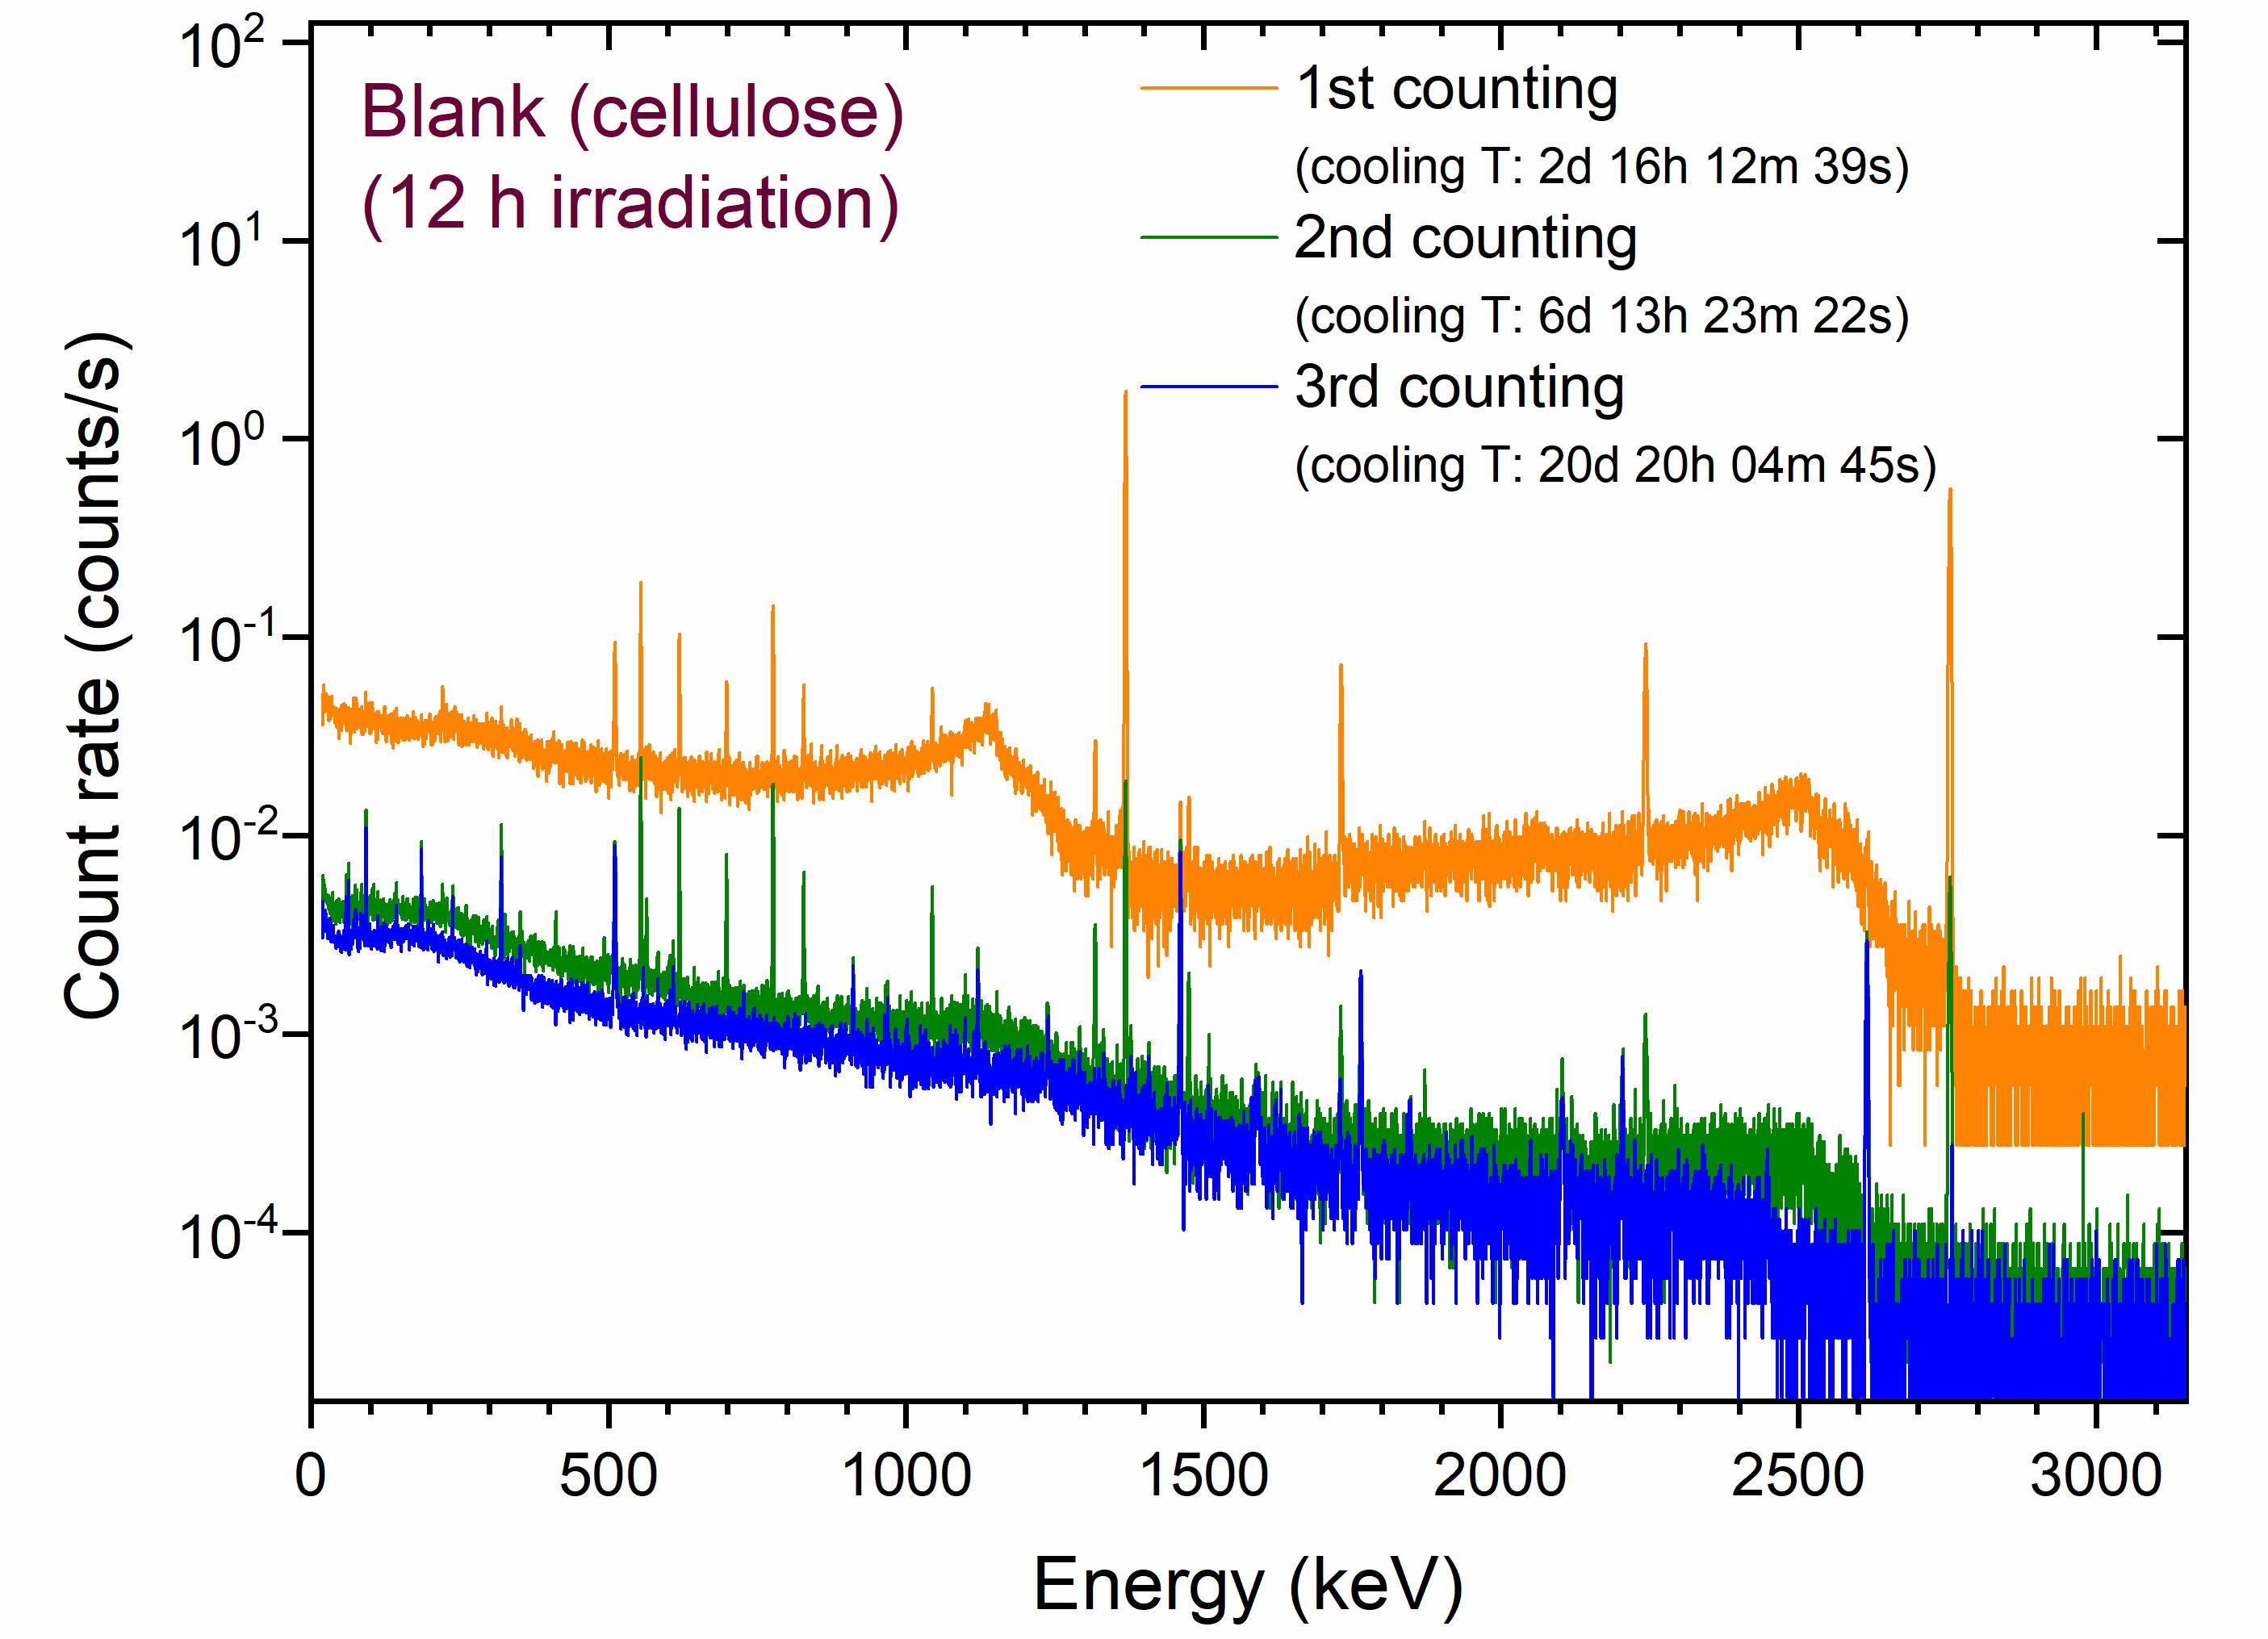


**Figure S2.** Gamma-ray spectra of cellulose paper after 5 min and 12 h irradiation**.**

**Table S1.** Mass fractions, RSDs, and LODs of samples obtained by *k*0-INAA.

| **El.** | **NIST SRM 1648a Urban Particulate Matter** | | | | **KRISS Urban Dust CRM Candidate** | | | | **KRISS Ash CRM Candidate** | | | |
| --- | --- | --- | --- | --- | --- | --- | --- | --- | --- | --- | --- | --- |
| **Mass Fraction (mg/kg)** | **RSD**  **(%)** | **n** | **LOD (mg/kg)** | **Mass Fraction (mg/kg)** | **RSD**  **(%)** | **n** | **LOD (mg/kg)** | **Mass Fraction (mg/kg)** | **RSD**  **(%)** | **n** | **LOD (mg/kg)** |
| Ag | 6.94 | 2.79 | 9 | 0.77 | 1.27 | 13.30 | 5 | 1.08 | 20.3 | 1.97 | 3 | 0.5 |
| Al | 33528 | 1.32 | 3 | 106 | 49359 | 2.97 | 3 | 164 | 106021 | 0.59 | 3 | 216 |
| As | 124.9 | 0.93 | 9 | 1.8 | 34.7 | 1.67 | 6 | 2.3 | 19.4 | 1.06 | 3 | 0.7 |
| Au | 0.028 | 31.84 | 9 | 0.006 | 0.279 | 49.72 | 6 | 0.006 | 4.08 | 3.18 | 3 | 0.003 |
| Ba | 680 | 7.84 | 12 | 270 | 1361 | 3.99 | 9 | 315 | 1917 | 12.17 | 6 | 304 |
| Br | 520 | 1.64 | 11 | 1 | 57.8 | 1.25 | 6 | 1.4 | 2.17 | 2.32 | 3 | 0.43 |
| Ca | 56422 | 3.06 | 12 | 3132 | 42076 | 4.33 | 9 | 1905 | 48097 | 5.16 | 6 | 2853 |
| Cd | 76.3 | 2.42 | 9 | 5.6 | 5.45 | 23.04 | 3 | 5.23 | 7.22 | 7.69 | 3 | 3.25 |
| Ce | 50.8 | 3.87 | 9 | 0.9 | 69.1 | 5.78 | 6 | 1.0 | 99.1 | 2.30 | 3 | 0.9 |
| Cl | 4729 | 0.47 | 3 | 112 | 12642 | 1.92 | 3 | 183 | N/A | N/A | 3 | 112 |
| Co | 17.3 | 3.09 | 9 | 0.1 | 19.1 | 3.41 | 6 | 0.1 | 16.8 | 1.12 | 3 | 0.1 |
| Cr | 397 | 3.52 | 9 | 2 | 219 | 5.10 | 6 | 2 | 238 | 1.18 | 3 | 1 |
| Cs | 3.38 | 1.47 | 9 | 0.15 | 4.67 | 1.53 | 6 | 0.21 | 5.30 | 1.56 | 3 | 0.09 |
| Cu | 682 | 13.79 | 6 | 99 | 854 | 8.19 | 3 | 113 | 2054 | 12.34 | 6 | 115 |
| Dy | 3.37 | 4.64 | 3 | 1.31 | 3.40 | 8.67 | 3 | 1.52 | 3.95 | 8.56 | 3 | 1.28 |
| Eu | 1.52 | 3.13 | 9 | 0.02 | 1.15 | 4.18 | 6 | 0.03 | 1.32 | 3.60 | 3 | 0.02 |
| Fe | 38162 | 2.83 | 9 | 78 | 39139 | 3.80 | 6 | 97 | 39446 | 1.43 | 3 | 49 |
| Ga | 17.5 | 4.36 | 8 | 11.9 | N/A | N/A | 6 | 18.1 | 24.6 | 6.13 | 3 | 6.1 |
| Hf | 4.15 | 2.48 | 9 | 0.13 | 7.40 | 2.05 | 6 | 0.15 | 4.74 | 1.98 | 3 | 0.09 |
| Hg | 1.49 | 9.23 | 9 | 0.44 | 0.447 | 18.36 | 6 | 0.350 | N/A | N/A | 3 | 0.5 |
| I | 20.5 | N/A | 1 | 17.9 | 27.2 | 15.38 | 3 | 19.3 | N/A | N/A | 3 | 18 |
| In | 0.986 | 2.93 | 3 | 0.082 | 1.08 | 1.31 | 3 | 0.09 | 0.547 | 13.06 | 3 | 0.091 |
| K | 9986 | 5.31 | 12 | 2969 | 16739 | 8.19 | 9 | 3948 | 29630 | 5.54 | 6 | 3432 |
| La | 35.3 | 2.81 | 9 | 0.1 | 36.4 | 4.78 | 6 | 0.1 | 55.3 | 1.54 | 3 | 0.1 |
| Mg | 7992 | 4.70 | 3 | 1480 | 10331 | 0.99 | 3 | 1774 | 18834 | 6.39 | 3 | 1923 |
| Mn | 790 | 1.24 | 3 | 1 | 682 | 2.48 | 3 | 2 | 1170 | 0.30 | 3 | 1 |
| Mo | 18.4 | 3.01 | 9 | 2.8 | 25.9 | 4.45 | 6 | 2.7 | 26.0 | 2.16 | 3 | 2.6 |
| Na | 4295 | 2.48 | 12 | 43 | 14302 | 2.62 | 9 | 63 | 8499 | 1.11 | 6 | 51 |
| Nd | 27.2 | 5.69 | 9 | 4.0 | 27.6 | 5.57 | 6 | 2.7 | 35.2 | 5.70 | 3 | 4.0 |
| Rb | 48.1 | 3.14 | 9 | 5.1 | 95.3 | 2.20 | 6 | 4.4 | 114 | 1.06 | 3 | 3 |
| Sb | 44.6 | 1.56 | 9 | 0.1 | 73.3 | 1.03 | 6 | 0.1 | 9.78 | 1.51 | 3 | 0.05 |
| Sc | 6.54 | 2.91 | 9 | 0.01 | 7.70 | 3.68 | 6 | 0.01 | 8.12 | 1.40 | 3 | 0.01 |
| Se | 26.1 | 2.79 | 9 | 0.9 | 6.01 | 4.91 | 6 | 1.10 | 2.13 | 0.90 | 3 | 0.81 |
| Sm | 4.32 | 1.91 | 9 | 0.03 | 4.75 | 1.50 | 6 | 0.03 | 6.80 | 3.39 | 3 | 0.03 |
| Sn | 151 | 7.29 | 9 | 74 | 138 | 12.23 | 6 | 105 | 146 | 4.35 | 3 | 47 |
| Sr | 226 | 5.52 | 9 | 67 | - | - | 6 | 94.2 | 416 | 2.03 | 3 | 41 |
| Ta | 6.47 | 4.18 | 9 | 0.05 | 1.01 | 4.52 | 6 | 0.05 | 1.22 | 3.40 | 3 | 0.05 |
| Tb | 0.518 | 2.53 | 9 | 0.056 | 0.837 | 1.72 | 6 | 0.078 | 0.723 | 1.59 | 3 | 0.043 |
| Th | 7.19 | 2.15 | 9 | 0.12 | 12.7 | 1.87 | 6 | 0.1 | 15.6 | 3.43 | 3 | 0.1 |
| Ti | 3855 | 3.67 | 3 | 754 | 3815 | 4.60 | 3 | 905 | 4712 | 2.27 | 3 | 1216 |
| U | 5.36 | 2.49 | 9 | 0.23 | 2.96 | 8.71 | 6 | 0.23 | 94.6 | 1.67 | 3 | 0.2 |
| V | 131 | 1.08 | 3 | 3 | 64.9 | 2.68 | 3 | 3.6 | 74.1 | 1.67 | 3 | 4.4 |
| W | 5.55 | 10.16 | 9 | 3.10 | 28.4 | 3.53 | 6 | 3.9 | 14.5 | 1.74 | 3 | 2.0 |
| Yb | 1.71 | 3.47 | 9 | 0.18 | 1.85 | 3.21 | 6 | 0.14 | 1.70 | 0.50 | 3 | 0.11 |
| Zn | 4623 | 2.63 | 9 | 3 | 21126 | 3.19 | 6 | 3 | 2852 | 1.61 | 3 | 3 |
| Zr | 155 | 11.34 | 9 | 99 | 314 | 7.18 | 6 | 140 | 226 | 4.83 | 3 | 59 |

RSD: relative standard deviation; n: number of replicates; LOD: limit of detection; N/A: not available.

**Table S2.** Mass fractions of elements in NIST SRM 1648a, KRISS urban dust CRM candidate, and KRISS ash CRM candidate analyzed by WD-XRF and *k*0-INAA**.**

| **El.** | **NIST SRM 1648a Urban Particulate Matter** | | | | | **KRISS Urban Dust CRM Candidate** | | | | | **KRISS Ash CRM Candidate** | | | | |
| --- | --- | --- | --- | --- | --- | --- | --- | --- | --- | --- | --- | --- | --- | --- | --- |
| ***k*0-INAA** | | **WD-XRF** | | ***% dev.* XRF/**  **INAA** | ***k*0-INAA** | | **WD-XRF** | | ***% dev.***  **XRF/**  **INAA** | ***k*0-INAA** | | **WD-XRF** | | ***% dev.***  **XRF/**  **INAA** |
| **Mass Fraction (mg/kg)** | **U**  **(*k* = 2), (mg/kg)** | **Mass Fraction (mg/kg)** | **U**  **(*k* = 2), (mg/kg)** | **Mass Fraction (mg/kg)** | **U**  **(*k* = 2), (mg/kg)** | **Mass Fraction (mg/kg)** | **U**  **(*k* = 2), (mg/kg)** | **Mass Fraction (mg/kg)** | **U**  **(*k* = 2), (mg/kg)** | **Mass Fraction (mg/kg)** | **U**  **(*k* = 2), (mg/kg)** |
| Al | 33528 | 2402 | 33850 | 2034 | 1.0% | 49359 | 3847 | 48433 | 2767 | −1.9% | 106021 | 7457 | 96127 | 5109 | −9.3% |
| As | 124.9 | 8.8 | 125.5 | 8.6 | 0.5% | 34.7 | 2.5 | N/A | N/A | - | 19.4 | 1.4 | N/A | N/A | - |
| Ba | 680 | 57 | N/A | N/A | - | 1361 | 102 | 1767 | 347 | 29.8% | 1917 | 233 | 2328 | 403 | 21.4% |
| Ca | 56422 | 4074 | 63650 | 3219 | 12.8% | 42076 | 3186 | 46567 | 2383 | 10.7% | 48097 | 3929 | 50671 | 2590 | 5.4% |
| Cr | 397 | 29 | 455 | 61 | 14.6% | 219 | 18 | 283 | 57 | 29.4% | 238 | 17 | 233 | 50 | −1.9% |
| Cu | 682 | 90 | 577 | 38 | −15.5% | 854 | 100 | 749 | 47 | −12.3% | 2054 | 252 | 1969 | 105 | −4.1% |
| Fe | 38162 | 2767 | 41500 | N/A | 8.7% | 39139 | 2997 | 43333 | N/A | 10.7% | 39446 | 2838 | 45687 | N/A | 15.8% |
| K | 9986 | 763 | 10600 | 628 | 6.1% | 16739 | 1486 | 17400 | 967 | 3.9% | 29630 | 2470 | 31331 | 1658 | 5.7% |
| Mg | 7992 | 708 | 7340 | 721 | −8.2% | 10331 | 733 | 10037 | 876 | −2.8% | 18834 | 1916 | 17654 | 1256 | −6.3% |
| Mn | 790 | 56 | 840 | 68 | 6.4% | 682 | 52 | 664 | 61 | −2.7% | 1170 | 82 | 1183 | 86 | 1.1% |
| Na | 4295 | 308 | 4700 | 1014 | 9.4% | 14302 | 1033 | 16000 | 1685 | 11.9% | 8499 | 601 | 8827 | 1264 | 3.9% |
| Sr | 226 | 18 | 219 | 21 | −3.2% | N/A | N/A | 194 | 20 | - | 416 | 31 | 412 | 28 | −0.9% |
| Ti | 3855 | 315 | 4045 | 273 | 4.9% | 3815 | 335 | 4020 | 273 | 5.4% | 4712 | 352 | 5131 | 334 | 8.9% |
| V | 131 | 9 | 180 | 60 | 37.3% | 64.9 | 5.0 | N/A | N/A | - | 74.1 | 5.4 | N/A | N/A | - |
| Zn | 4623 | 334 | 4506 | 226 | −2.5% | 21126 | 1578 | 21000 | N/A | −0.6% | 2852 | 207 | 3104 | 159 | 8.8% |
| Zr | 155 | 16 | 146 | 15 | −5.7% | 314 | 29 | 266 | 21 | −15.2% | 226 | 20 | 158 | 15 | −30.0% |

U: expanded uncertainty**;** N/A: not available.
